# Supplementary figures and images for: Cancer Immunotherapy with Immunomodulatory Anti-CD137 and Anti–PD-1 Monoclonal Antibodies Requires BATF3-Dependent Dendritic Cells
Source: Oxford University Press journal article supplement (doi:10.1158/2159-8290.cd-15-0510), 2015-10-22

## Supplementary Fig. S2

### A

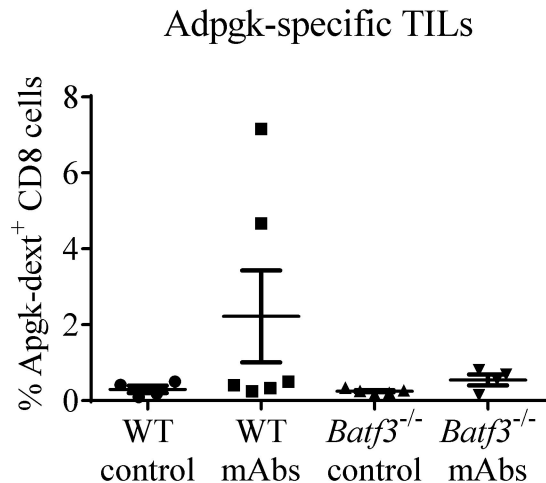

### B

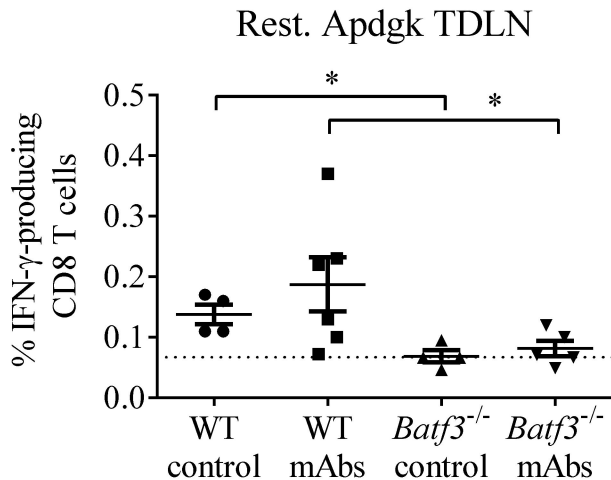

Supplement: 21598290cd150510-sup-148988_1_supp_0_nwk94f.pdf [file 21598290cd150510-sup-148988_1_supp_0_nwk94f.pdf]
